# Supplementary material for: Alarmin augments the antitumor immunity of lentiviral vaccine in ectopic, orthotopic and autochthonous hepatocellular carcinoma mice
Source: PubMed Central journal article supplement — Theranostics. 2019 May 31;9(14):4006–18. doi: 10.7150/thno.32720 (PMC6592173; doi:10.7150/thno.32720), 2019-05-31
Supplement: thnov09p4006s1.pdf [file thnov09p4006s1.pdf]

## Supplementary Figures

### Supplementary Figure 1

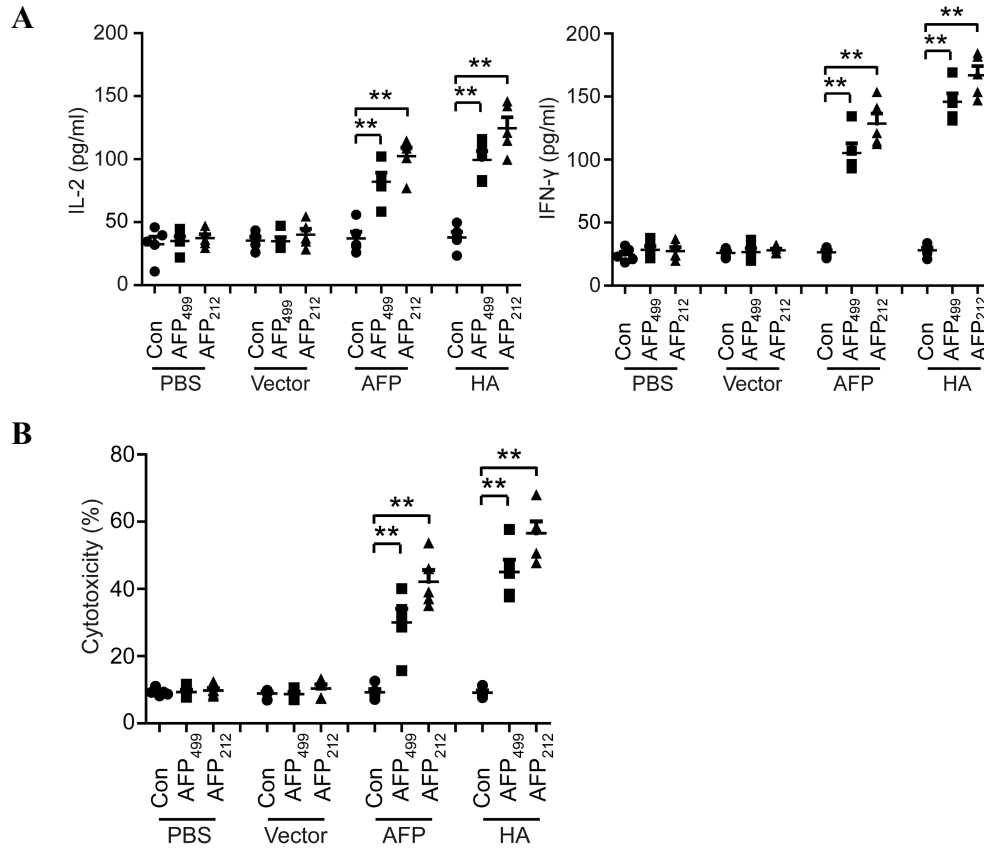

**Supplementary Figure 1. *In vitro* antigen-specific assay for lenti-HA and lenti-AFP.** Day-7 established ectopic HCC mice were treated with lenti-HA, lenti-AFP or lentivirus containing empty vectors ( $3 \times 10^7$  copies) per week for 3 weeks subcutaneously. Mixed splenic T lymphocytes were harvested from treated HCC mice 3 days after last injection. **(A)** Measurement of IFN- $\gamma$  and IL-2 in supernatants of mixed splenic T lymphocytes from different treatment groups stimulated with control peptide (Con), AFP<sub>212</sub> and AFP<sub>499</sub> for 72 hrs. **(B)** Cytolysis rates against murine Hepa1-6 cells with effector T cells (activated splenic T lymphocytes) at the E: T ratio of 10:1 (n=5, \*\*P<0.01). N.s denotes not significant. Two-tailed test was used for

statistical analysis.

### Supplementary Figure 2

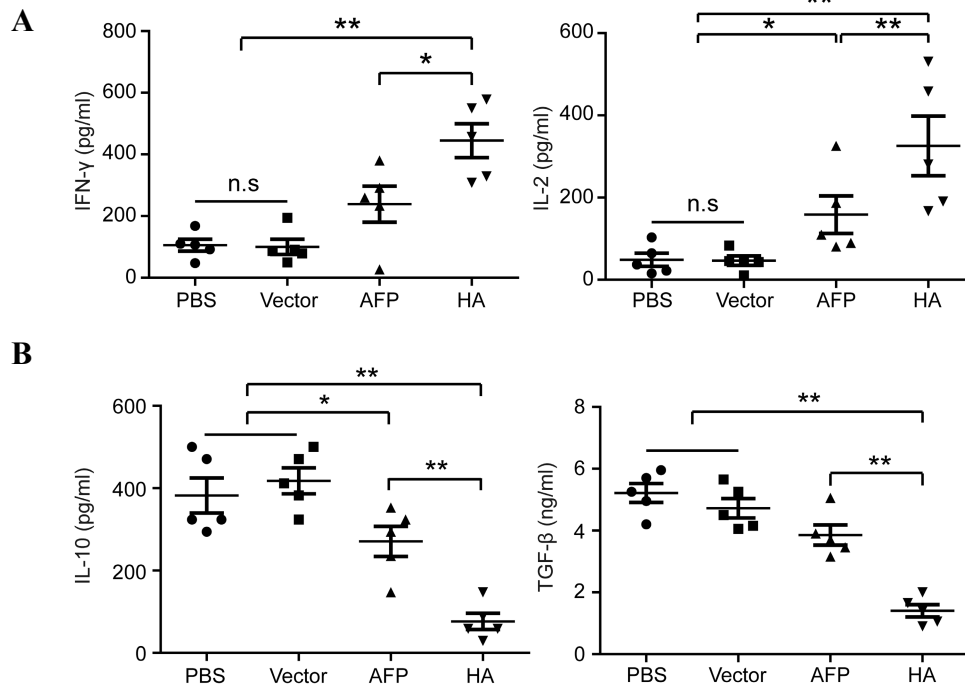

**Supplementary Figure 2.** Measurement of IFN- $\gamma$  and IL-2 (**A**) or IL-10 and TGF- $\beta$  (**B**) in tumor lysates from ectopic HCC mice treated with lenti-HA or lenti-AFP ( $3 \times 10^7$  copies) ( $n=5$ ,  $*P<0.05$ ;  $**P<0.01$ ). N.s denotes not significant. Two-tailed t test was used for statistical analysis and all the experiments were repeated twice (two repeated experiments yielded similar results and thus one representative result was shown).

Supplementary Figure 3

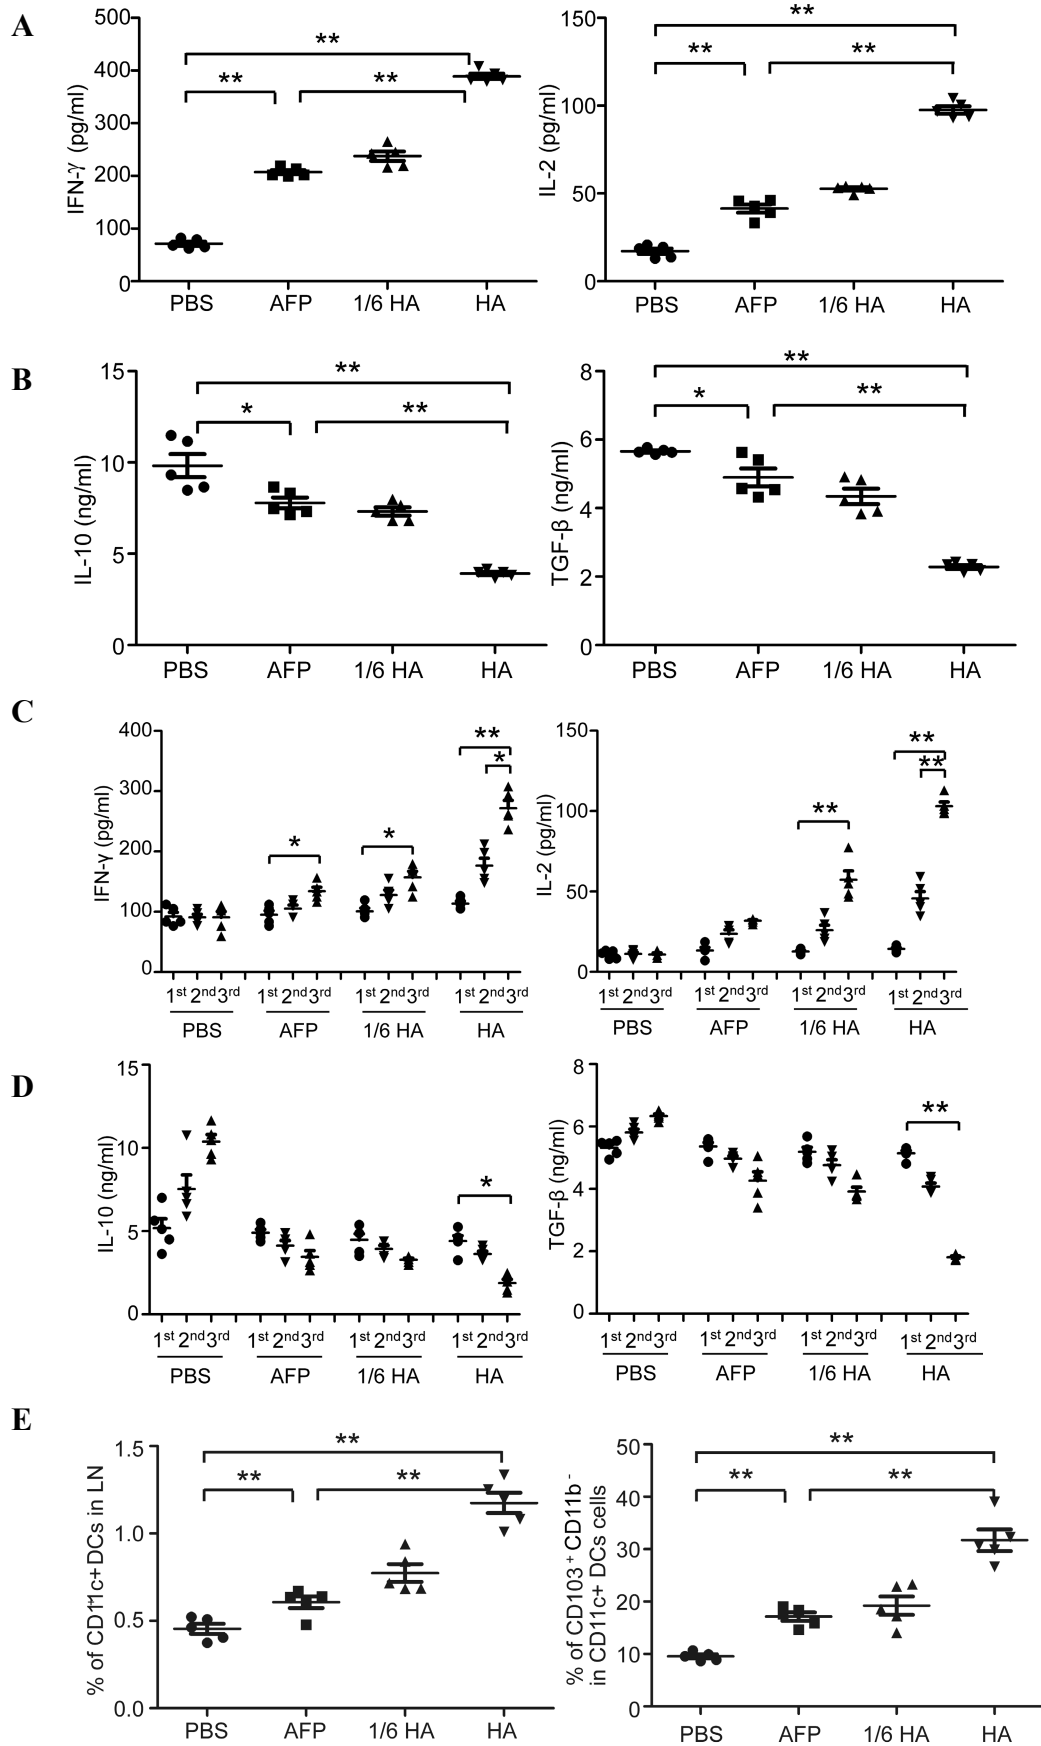

**Supplementary Figure 3. Examination on tumor microenvironment and cumulative immune responses in orthotopic HCC mice treated with lentiviral vaccines weekly for 3 weeks.** Measurement of IFN- $\gamma$  and IL-2 (A) or IL-10 and TGF- $\beta$  (B) in tumor tissues from orthotopic HCC mice treated with lenti-HA or lenti-AFP 3 days after last injection (n=5, \*P<0.05; \*\*P<0.01). Measurement of IL-2 and IFN- $\gamma$  (C) or IL-10 and TGF- $\beta$  (D) in blood from orthotopic HCC mice treated with lentiviral vaccines at different time-points (n=5, \*P<0.05; \*\*P<0.01). Blood was collected from orthotopic HCC mice 3 days after each injection via retro-orbital bleeding. (E) Flow cytometric analysis of CD11c<sup>+</sup> and CD103<sup>+</sup>CD11b<sup>-</sup> DCs in inguinal lymph nodes from orthotopic C57BL/6 HCC mice treated with PBS, lenti-AFP or lenti-HA 3 days after last injection (n=5, \*\*P<0.01). Two-tailed t test was used for statistical analysis and all the experiments were repeated twice (two repeated experiments yielded similar results and thus one representative result was shown).

#### Supplementary Figure 4

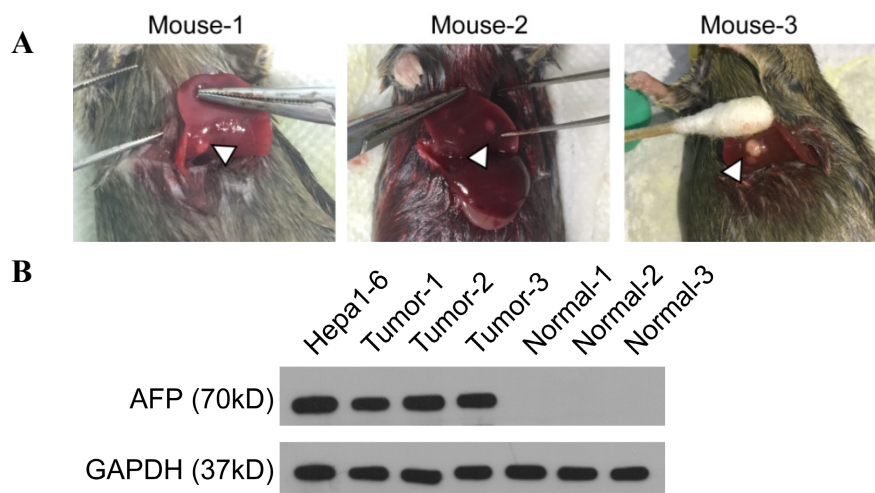

**Supplementary Figure 4. Characterization of DENA-induced autochthonous HCC mice.** (A) Morphological examination of micronodules in DENA-induced autochthonous HCC mice at 7.5 months after induction. Arrowheads point to the micronodules. (B) Western blot analysis for detecting the expression of AFP in tumor tissues from DENA-induced autochthonous HCC mice. Total protein (30  $\mu$ g) was loaded and GAPDH was used as a loading control.

**Supplementary Figure 5**

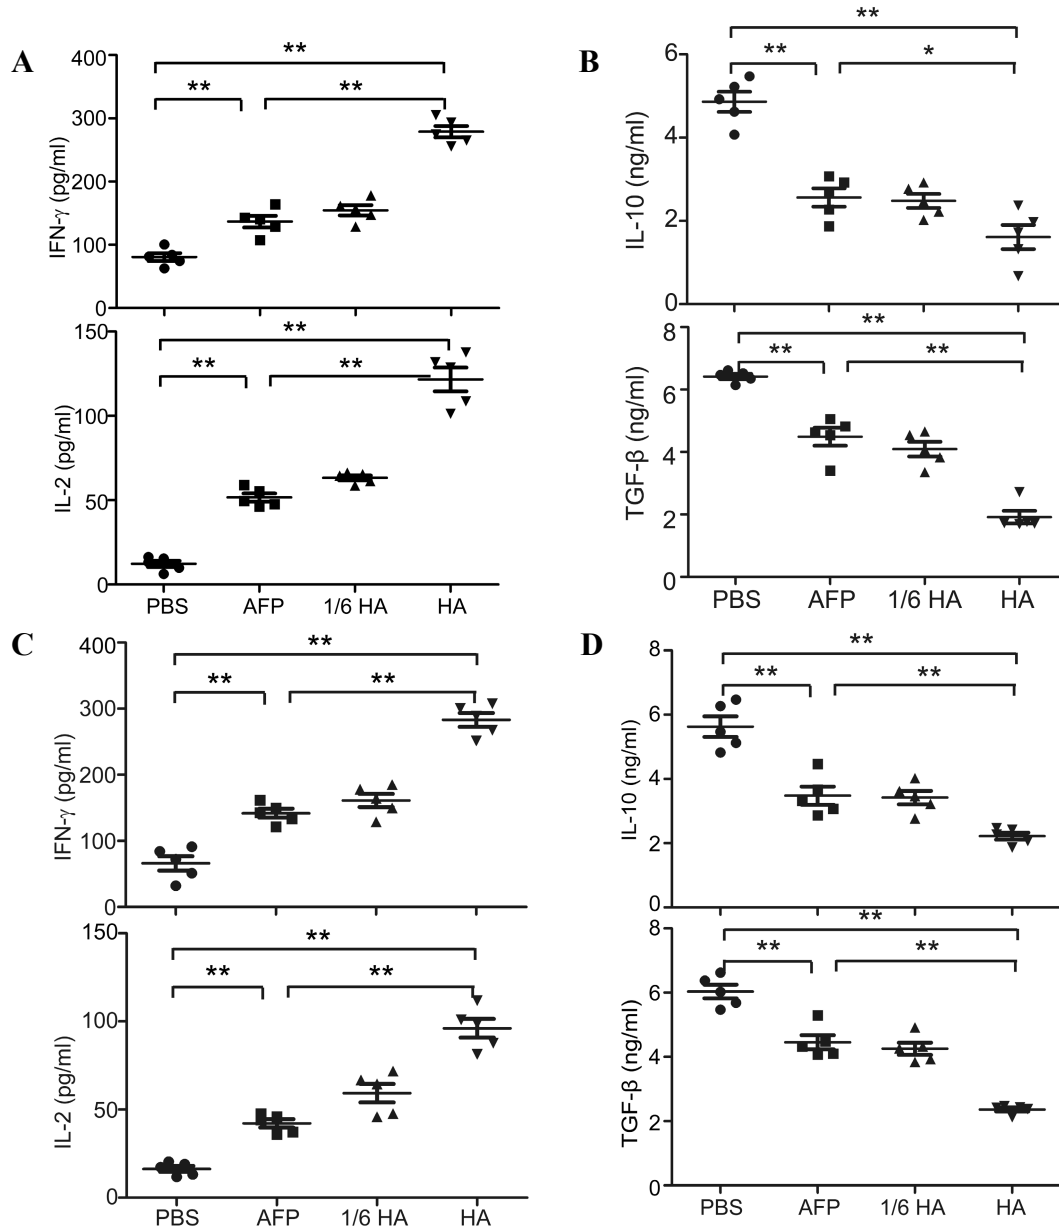

**Supplementary Figure 5. Examination on immune microenvironment in DENA-induced autochthonous HCC mice treated with lentiviral vaccines weekly for 3 weeks.** Measurement of IFN- $\gamma$  and IL-2 (A) or IL-10 and TGF- $\beta$  (B) in blood from autochthonous HCC mice treated with lenti-HA or lenti-AFP 3 days after last injection. Measurement of IFN- $\gamma$  and IL-2 (C) or IL-10 and TGF- $\beta$  (D) in tumor tissues from autochthonous HCC mice treated with lenti-HA or lenti-AFP 3 days after last injection (n=5, \*\*P<0.01). Two-tailed t test was used for statistical analysis.

**Supplementary Figure 6**

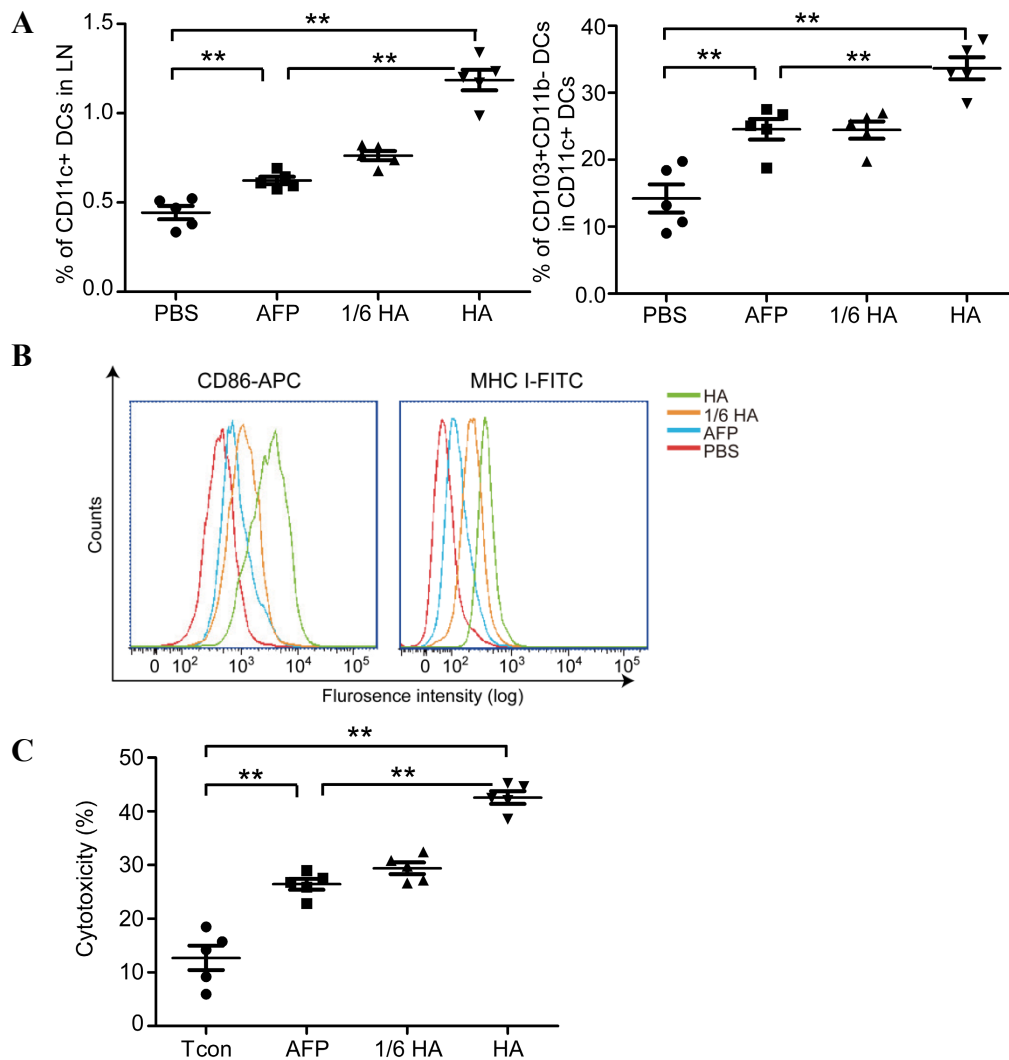

**Supplementary Figure 6. Analysis of immune cells in inguinal lymph nodes from treated autochthonous HCC mice and *in vitro* activity assay.** (A) Flow cytometric analysis of immune cells in inguinal lymph nodes (LN) from HCC mice treated with lenti-HA, lenti-AFP or PBS weekly for 3 weeks (n=5, \*\*P<0.01). (B) Flow cytometric analysis of surface markers and co-stimulatory molecules on CD103<sup>+</sup>CD11b<sup>-</sup> DCs from treated HCC mice. (C) Cytolysis assay for murine Hepa1-6 cells with effector T cells at the Effector: Target (E: T) ratio of 10:1 (n=5, \*\*P<0.001). Two-tailed t test was used for statistical analysis.

**Supplementary Figure 7**

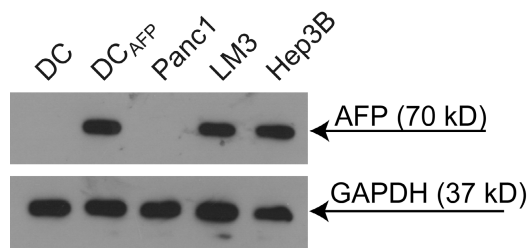

**Supplementary Figure 7. Western blot analysis for detecting the expression of AFP in different cell lysates.** DC<sub>AFP</sub> was used as a control. Total protein (30 μg) was loaded and GAPDH was used as a loading control.

## Supplementary Figure 8

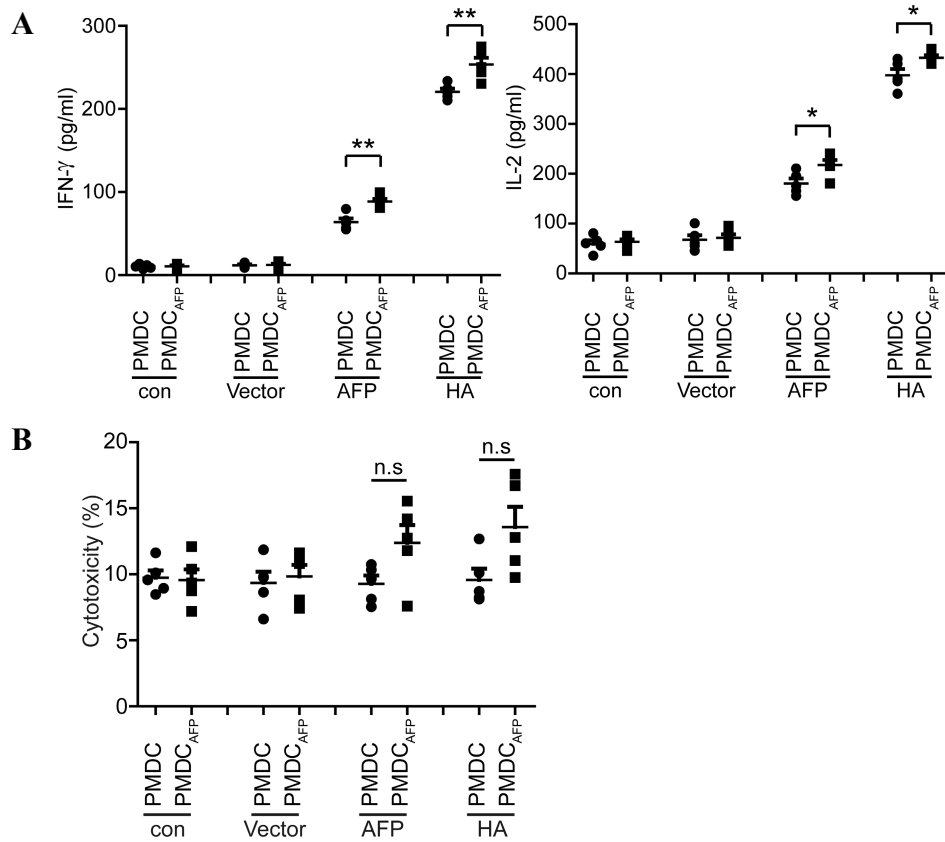

**Supplementary Figure 8. *In vitro* antigen-specific assay for human lenti-HA or lenti-AFP.** (A) Measurement of IL-2 and IFN- $\gamma$  in supernatants of human lymphocytes primed by lentivirus-transduced PMDCs, followed by further stimulation with recombinant AFP loaded PMDCs (PMDC<sub>AFP</sub>) or unpulsed PMDCs (PMDC), with ELISA (n=5, \*P<0.05; \*\*P<0.01). (B) Cytolysis assay for recombinant human AFP loaded PMDCs with lymphocytes primed by lenti-HA or lenti-AFP transduced PMDCs at the E: T (Effector: Target) ratio of 10:1 (n=5). N.s refers to not significant. Two-tailed t test was used for statistical analysis.
